# Supplementary material for: The trial to reduce antimicrobial use in nursing home residents with Alzheimer’s disease and other dementias: study protocol for a cluster randomized controlled trial
Source: Springer Nature journal article supplement (doi:10.1186/s13063-019-3675-y), 2019-10-15
Supplement: MOESM3 [file 17275100]

**Additional File 3.** The Trial to Reduce Antimicrobial use In Nursing home residents with Alzheimer's disease and other Dementias (TRAIN-AD) Administrator Survey

## Infection Management

1. Does your facility have an individual responsible for infection control?

- Yes
- No
- Do not know

1a. If yes, what are this person's responsibilities in addition to infection control?  
*Please mark all that apply.*

- Medical Director or Assistant Director
- Director/Assistant Director of Nursing Services
- Consultant Pharmacist
- Quality Coordinator/ Quality Management
- Staff Education/Staff Development
- Staff Nurse
- Employee Health
- Other (*please explain*)
- No other activities

2. Does your facility have an antibiotic stewardship program?

- Yes
- No
- Do not know

2a. If yes, indicate who is accountable for stewardship activities? *Please select all that apply.*

- Medical Director or Assistant Director
- Director/Assistant Director of Nursing Services
- Consultant Pharmacist
- Quality Coordinator/ Quality Management
- Staff Education/Staff Development
- Staff Nurse
- Employee Health
- Other (*please explain*)
- Do not know

3. Which of the following policies or programs are in place at your facility? *Please mark all that apply.*

- Collect data on antibiotic use
- Antibiotic prescribing guidelines or algorithms for lower respiratory tract infections (LRIs)
- Antibiotic prescribing guidelines or algorithms for urinary tract infections (UTIs)
- Restrict use of specific antibiotics
- Review cases to assess appropriateness of antibiotic administration and/or indication
- Provide feedback to clinicians on antibiotic use and prescribing
- Provide education resources for improving antibiotic use
- Other (*please explain*)
- Do not know

4. Does your facility currently use any standardized protocols or initiatives (e.g., reference algorithms) for diagnosing and treatment of UTIs?

- Yes
- No
- Refused to answer
- Do not know

4a. If yes, what specific protocols or initiatives for UTI management are used in your facility?

- Interact CARE PATH for treatment of symptoms of UTIs
- Massachusetts state initiative using the SBAR Protocol for Diagnosing UTIs in long-term care (LTC) environments
- Mass Coalition's ABCs for diagnosing UTIs in LTC
- Other

5. Does your facility currently use any standardized protocols or initiatives (e.g., reference algorithms) for diagnosing and treatment of LRIs?

- Yes
- No
- Refused to answer
- Do not know

5a. If yes, what specific protocols or initiatives for LRI management are used in your facility?

- Interact CARE PATH for treatment of symptoms of LRIs
- Massachusetts state initiative using the SBAR Protocol for Diagnosing LRIs in long-term care (LTC) environments
- Mass Coalition’s ABCs for diagnosing LRIs in LTC
- Other

### Capabilities

6. Does your facility have the capability to do chest x-rays on site?

- Yes
- No
- Do not know

7. Does your facility have the capability to manage infections on-site by administering intravenous antibiotics?

- Yes
- No
- Do not know

| 8. Please indicate how often your facility has <b>on-site</b> access to the following staff. <i>Please select <u>one</u> response in each row.</i> | Full-time                | Part-time                | On call                  | No access                |
|----------------------------------------------------------------------------------------------------------------------------------------------------|--------------------------|--------------------------|--------------------------|--------------------------|
| a. A physician                                                                                                                                     | <input type="checkbox"/> | <input type="checkbox"/> | <input type="checkbox"/> | <input type="checkbox"/> |
| b. A physician assistant                                                                                                                           | <input type="checkbox"/> | <input type="checkbox"/> | <input type="checkbox"/> | <input type="checkbox"/> |
| c. An advanced practice registered nurse, which includes nurse practitioners                                                                       | <input type="checkbox"/> | <input type="checkbox"/> | <input type="checkbox"/> | <input type="checkbox"/> |

### End-of-Life Care Practices and Processes

|                                                                                           | Rarely                   | Occasionally             | Often                    | Almost always            |
|-------------------------------------------------------------------------------------------|--------------------------|--------------------------|--------------------------|--------------------------|
| 9. How often do the LTC units in your facility use MOLST?                                 | <input type="checkbox"/> | <input type="checkbox"/> | <input type="checkbox"/> | <input type="checkbox"/> |
| 10. How often do the LTC units in your facility use INTERACT Advance Care Planning tools? | <input type="checkbox"/> | <input type="checkbox"/> | <input type="checkbox"/> | <input type="checkbox"/> |

11. Do the LTC units in your facility routinely use any other standardized documents to document advance directives?

- No
- Yes (*please describe*)
- Do not know

|                                                                                                                                                        | Rarely                   | Occasionally             | Often                    | Almost always            |
|--------------------------------------------------------------------------------------------------------------------------------------------------------|--------------------------|--------------------------|--------------------------|--------------------------|
| 12. How often does a resident with advanced dementia in your facility get referred to hospice?                                                         | <input type="checkbox"/> | <input type="checkbox"/> | <input type="checkbox"/> | <input type="checkbox"/> |
| 13. How often does a resident with advanced dementia in your facility get a consultation from a palliative care specialist other than through hospice? | <input type="checkbox"/> | <input type="checkbox"/> | <input type="checkbox"/> | <input type="checkbox"/> |

| 14. In your facility, how often are preferences for infection management discussed with proxies of residents with advanced dementia? | Rarely                   | Sometimes                | Often                    | Almost always            |
|--------------------------------------------------------------------------------------------------------------------------------------|--------------------------|--------------------------|--------------------------|--------------------------|
| a. On admission                                                                                                                      | <input type="checkbox"/> | <input type="checkbox"/> | <input type="checkbox"/> | <input type="checkbox"/> |
| b. During regular care plan meetings                                                                                                 | <input type="checkbox"/> | <input type="checkbox"/> | <input type="checkbox"/> | <input type="checkbox"/> |
| c. When a resident develops a fever or other sign/symptom of an infection                                                            | <input type="checkbox"/> | <input type="checkbox"/> | <input type="checkbox"/> | <input type="checkbox"/> |
| d. Following an event such as an aspiration                                                                                          | <input type="checkbox"/> | <input type="checkbox"/> | <input type="checkbox"/> | <input type="checkbox"/> |
